# Supplementary material for: Synthesis, Leishmanicidal, Trypanocidal, Antiproliferative Assay and Apoptotic Induction of (2-Phenoxypyridin-3-yl)naphthalene-1(2H)-one Derivatives
Source: MDPI journal article supplement (doi:10.3390/molecules27175626), 2022-08-31
Supplement: s1 [file s1]

## Supporting Information for

### **Synthesis, leishmanicidal, trypanocidal, antiproliferative assay and apoptotic induction of (2-phenoxy pyridin-3-yl)naphthalene-1(2*H*)-one derivatives**

Zuleima Blanco<sup>1</sup>, Esteban Fernandez-Moreira<sup>2</sup>, Michael R. Mijares<sup>3,4</sup>, Carmen Celis<sup>3</sup>, Gricelis Martínez<sup>3</sup>, Juan B. De Santics<sup>4,5</sup>, Soňa Gurská<sup>5</sup>, Petr Džubák<sup>5</sup>, Marián Hajdúch<sup>5</sup>, Ali Mijoba<sup>6</sup>, Yael García<sup>6</sup>, Xenón Serrano<sup>6</sup>, Nahum Herrera<sup>7</sup>, Jhonny Correa-Abril<sup>7</sup>, Yonathan Parra<sup>7</sup>, Jorge Ángel,<sup>8</sup> Hegira Ramírez<sup>9\*</sup> and Jaime E. Charris<sup>1,\*</sup>

<sup>1</sup> Organic Synthesis Laboratory, Faculty of Pharmacy, Central University of Venezuela, 47206, Los Chaguaramos 1041-A, Caracas, Venezuela

<sup>2</sup> Escuela de Medicina, Universidad Espíritu Santo, Samborondón, Ecuador

<sup>3</sup> Biotechnology Unit, Faculty of Pharmacy, Central University of Venezuela, 47206, Los Chaguaramos 1041-A, Caracas, Venezuela

<sup>4</sup> Institute of Immunology, Faculty of Medicine, Central University of Venezuela, 50109, Los Chaguaramos 1050-A, Caracas, Venezuela

<sup>5</sup> Institute of Molecular and Translational Medicine, Faculty of Medicine, Palacky University, Hněvotínská 1333/5, Olomouc 779 00, Czech Republic

<sup>6</sup> Laboratory of Biology and Chemotherapy of Tropical Parasitosis of the Foundation Institute for Advanced Studies (IDEA) Health Area, 1080, Caracas, Venezuela

<sup>7</sup> Grupo de Investigación en Moléculas y Materiales Funcionales (MoléMater), Dirección de Investigación, Universidad Central del Ecuador. Jerónimo Leiton s/n y Gilberto Gatto Sobral, 170521, Quito. Ecuador

<sup>8</sup> Laboratorio de Síntesis Orgánica y Diseño de Fármacos, Dpto. de Química, Facultad Experimental de Ciencias, Universidad del Zulia, Maracaibo, Venezuela

<sup>9</sup> Universidad ECOTEC, Km. 13.5 Vía Samborondón, Samborondón, Guayas, Ecuador

## Table of Contents of Figure caption

|            |                                               | Page |
|------------|-----------------------------------------------|------|
| <b>S1</b>  | The <sup>1</sup> H NMR spectrum of <b>3</b>   | 3    |
| <b>S2</b>  | The <sup>13</sup> C NMR spectrum of <b>3</b>  | 4    |
| <b>S3</b>  | The <sup>1</sup> H NMR spectrum of <b>4</b>   | 5    |
| <b>S4</b>  | The <sup>13</sup> C NMR spectrum of <b>4</b>  | 6    |
| <b>S5</b>  | The <sup>1</sup> H NMR spectrum of <b>5</b>   | 7    |
| <b>S6</b>  | The <sup>13</sup> C NMR spectrum of <b>5</b>  | 8    |
| <b>S7</b>  | The <sup>1</sup> H NMR spectrum of <b>6</b>   | 9    |
| <b>S8</b>  | The <sup>13</sup> C NMR spectrum of <b>6</b>  | 10   |
| <b>S9</b>  | The <sup>1</sup> H NMR spectrum of <b>8</b>   | 11   |
| <b>S10</b> | The <sup>13</sup> C NMR spectrum of <b>8</b>  | 12   |
| <b>S11</b> | The Mass fragmentation of <b>8</b>            | 13   |
| <b>S12</b> | The <sup>1</sup> H NMR spectrum of <b>10</b>  | 14   |
| <b>S13</b> | The <sup>13</sup> C NMR spectrum of <b>10</b> | 15   |
| <b>S14</b> | The Mass fragmentation of <b>10</b>           | 16   |
| <b>S15</b> | The <sup>1</sup> H NMR spectrum of <b>13</b>  | 17   |
| <b>S16</b> | The <sup>13</sup> C NMR spectrum of <b>13</b> | 18   |
| <b>S17</b> | The Mass fragmentation of <b>13</b>           | 19   |
| <b>S18</b> | The <sup>1</sup> H NMR spectrum of <b>14</b>  | 20   |
| <b>S19</b> | The <sup>13</sup> C NMR spectrum of <b>14</b> | 21   |
| <b>S20</b> | The Mass fragmentation of <b>14</b>           | 22   |
| <b>S21</b> | The <sup>1</sup> H NMR spectrum of <b>17</b>  | 23   |
| <b>S22</b> | The <sup>13</sup> C NMR spectrum of <b>17</b> | 24   |
| <b>S23</b> | The Mass fragmentation of <b>17</b>           | 25   |
| <b>S24</b> | The <sup>1</sup> H NMR spectrum of <b>18</b>  | 26   |
| <b>S25</b> | The <sup>13</sup> C NMR spectrum of <b>18</b> | 27   |
| <b>S26</b> | The Mass fragmentation of <b>18</b>           | 28   |
| <b>S27</b> | The <sup>1</sup> H NMR spectrum of <b>21</b>  | 29   |
| <b>S28</b> | The <sup>13</sup> C NMR spectrum of <b>21</b> | 30   |
| <b>S29</b> | The Mass fragmentation of <b>21</b>           | 31   |
| <b>S30</b> | The <sup>1</sup> H NMR spectrum of <b>22</b>  | 32   |
| <b>S31</b> | The <sup>13</sup> C NMR spectrum of <b>22</b> | 33   |
| <b>S32</b> | The Mass fragmentation of <b>22</b>           | 34   |

Figure S1

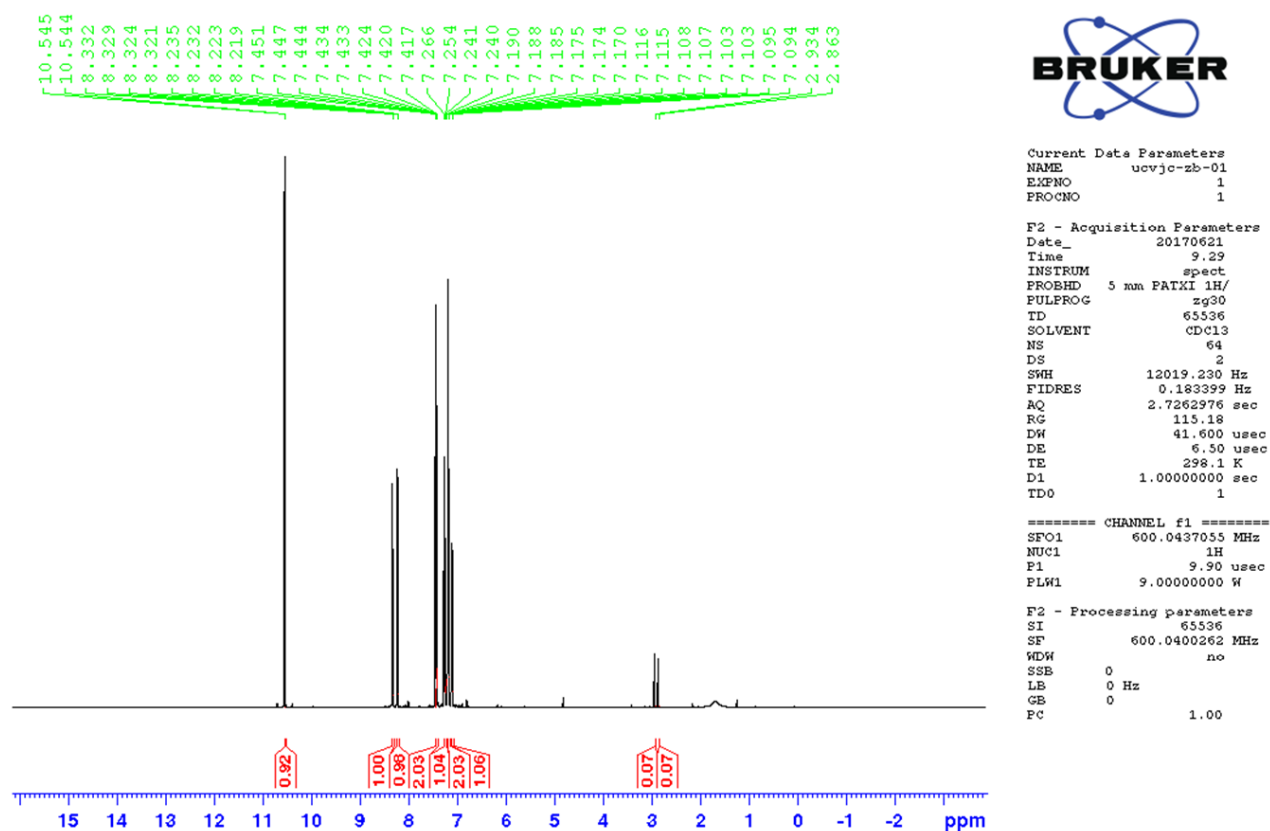

Figure S2

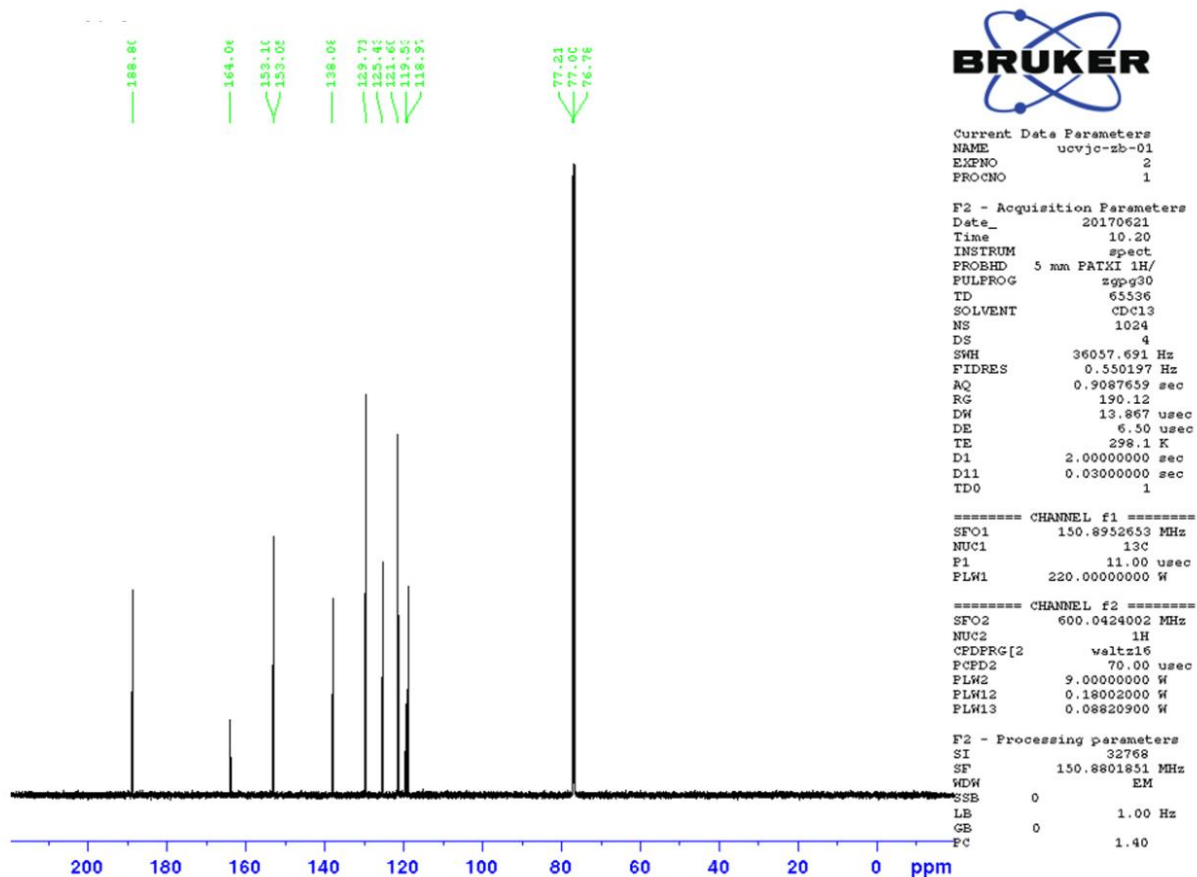

Figure S3

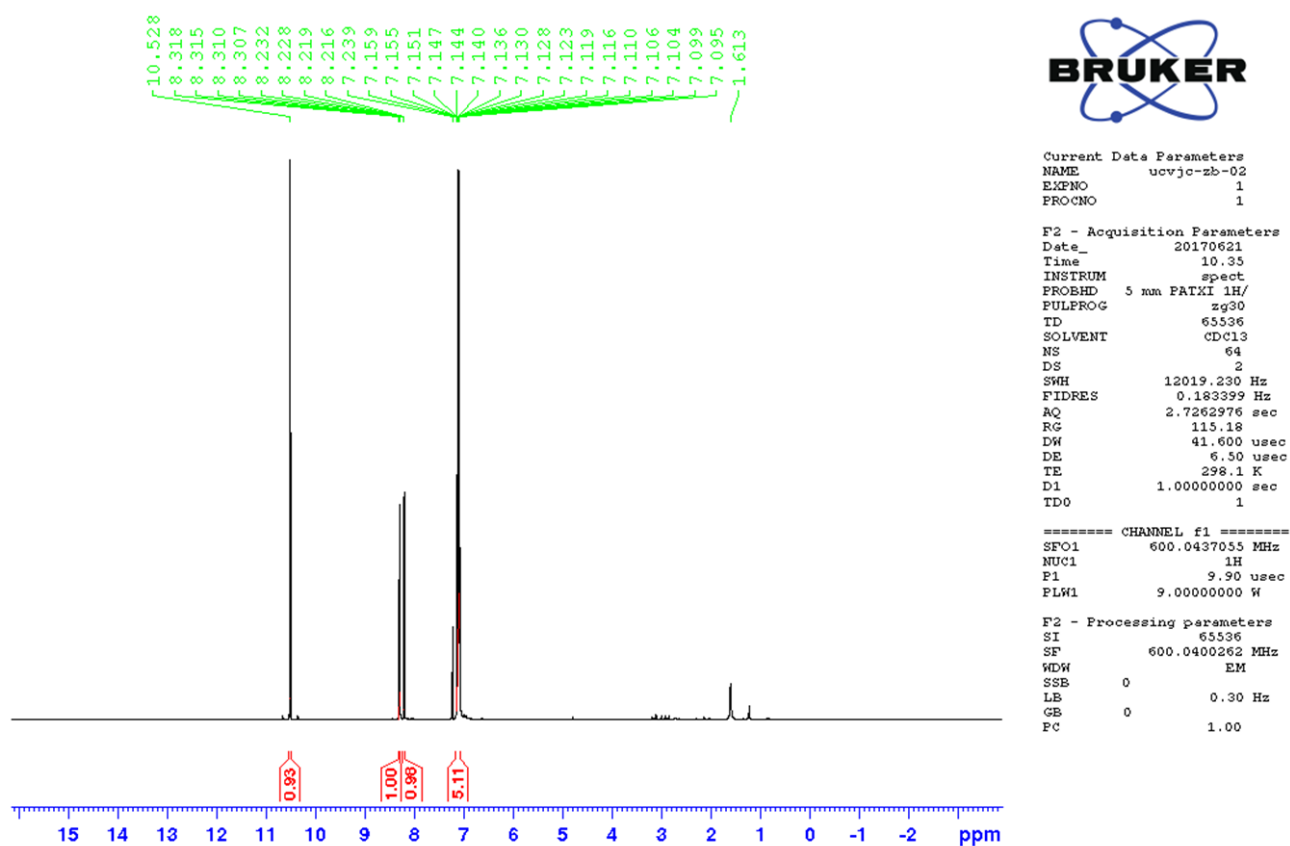

Figure S4

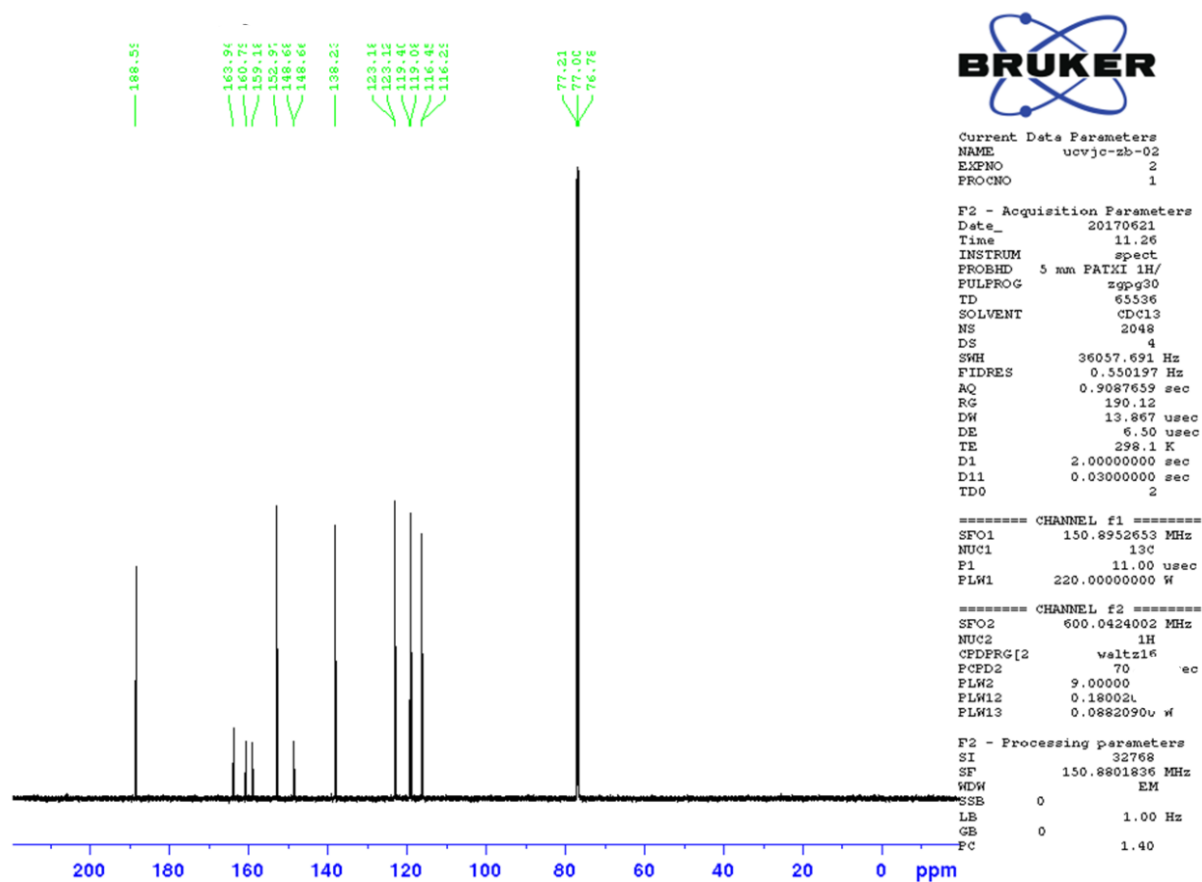

Figure S5

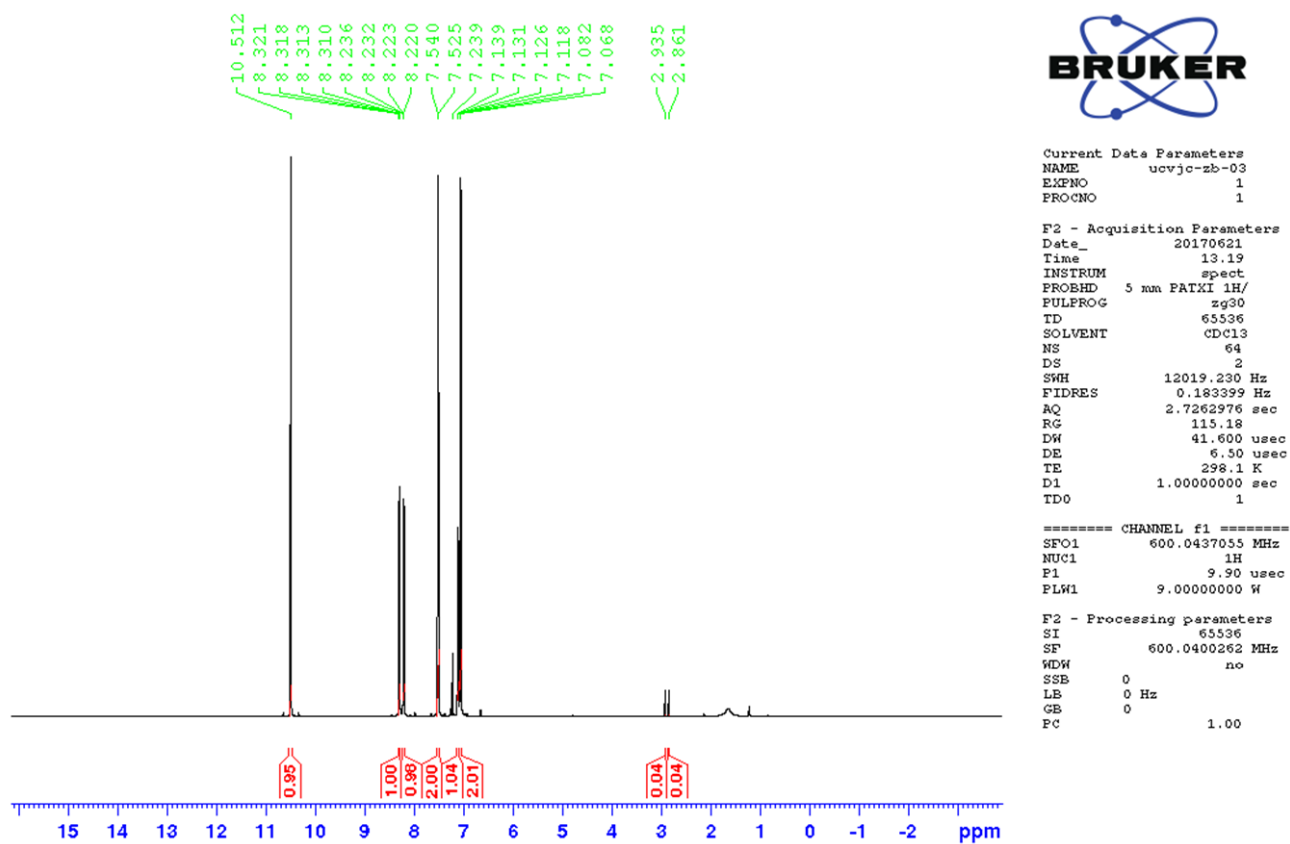

Figure S6

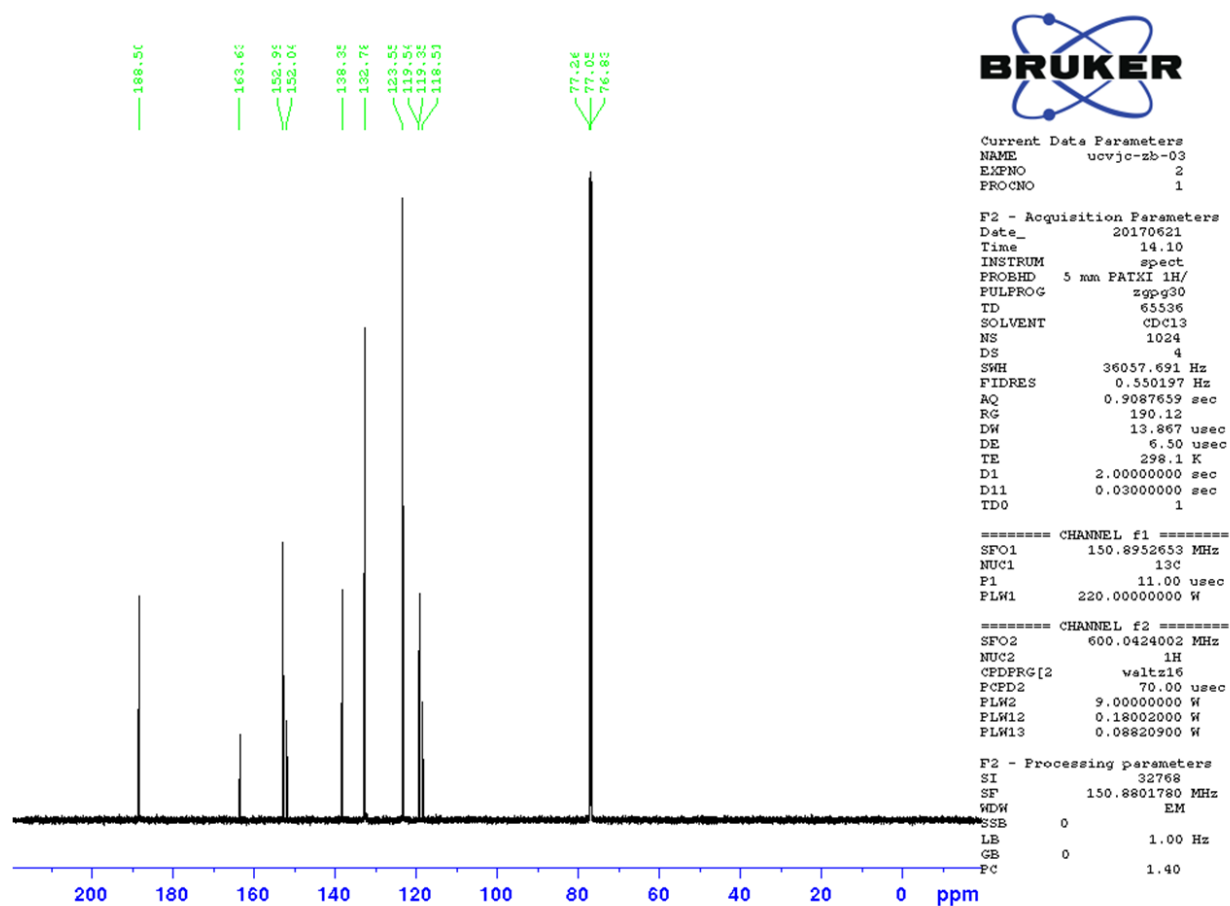



Figure S7

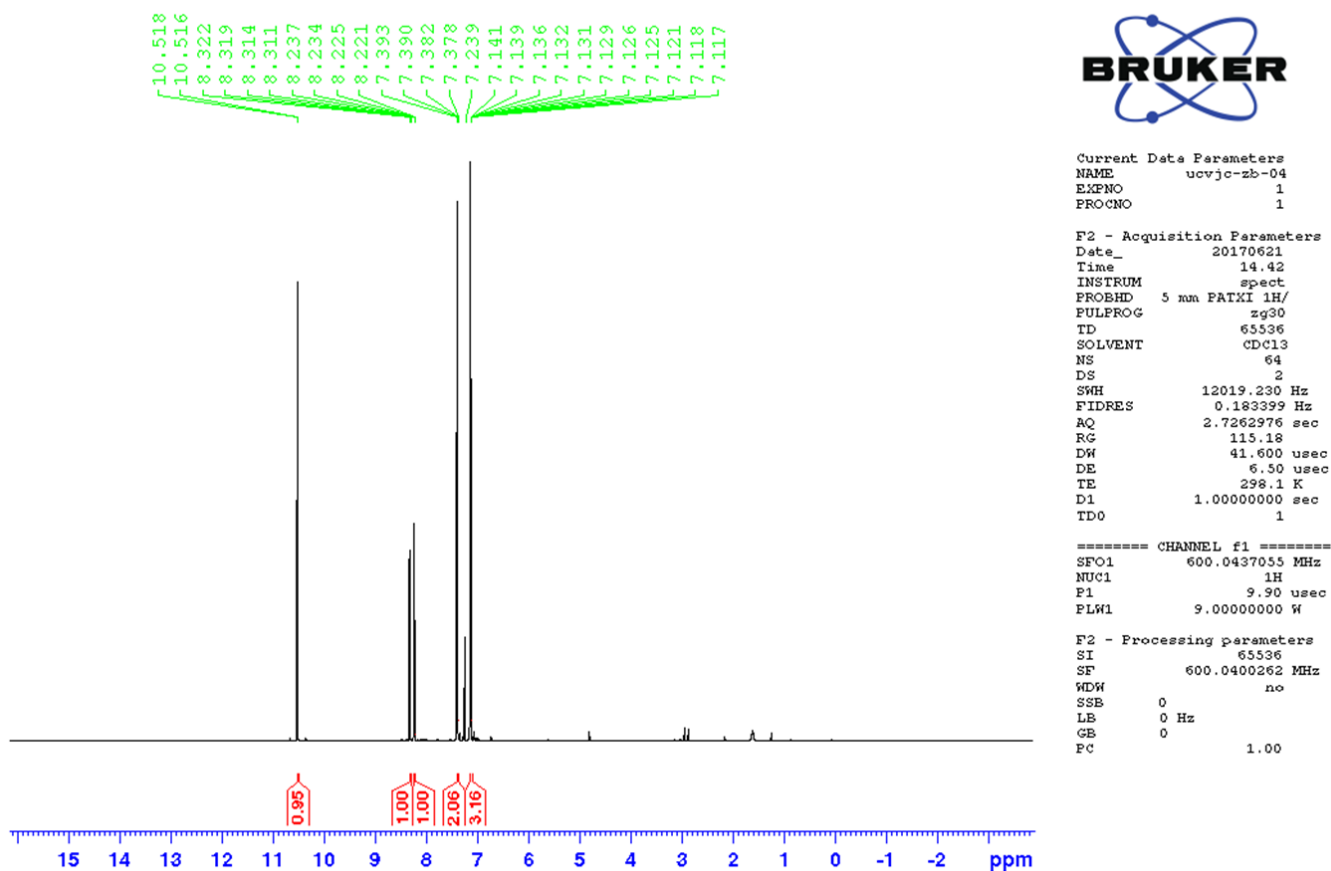

Figure S8

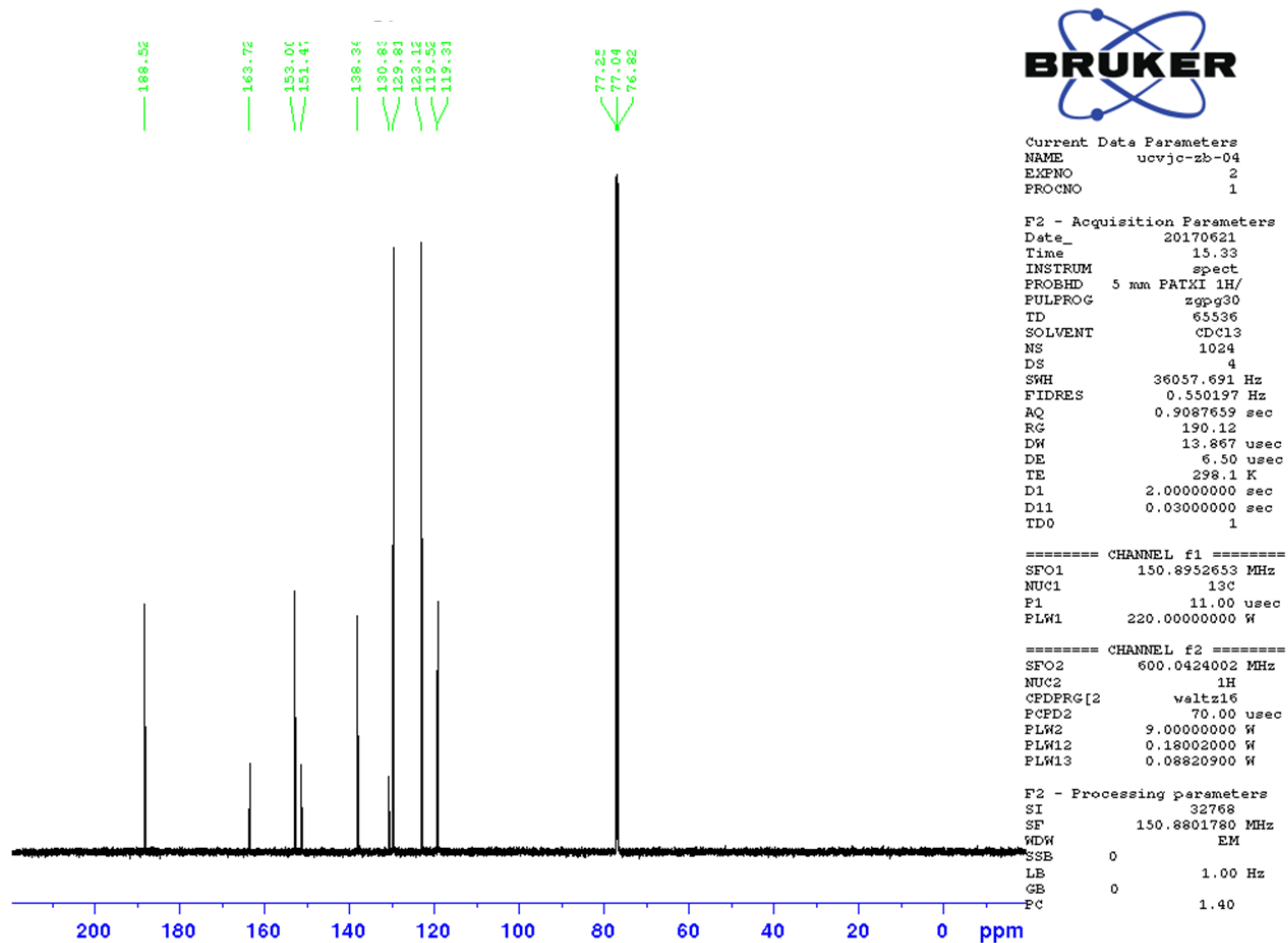

Figure S9

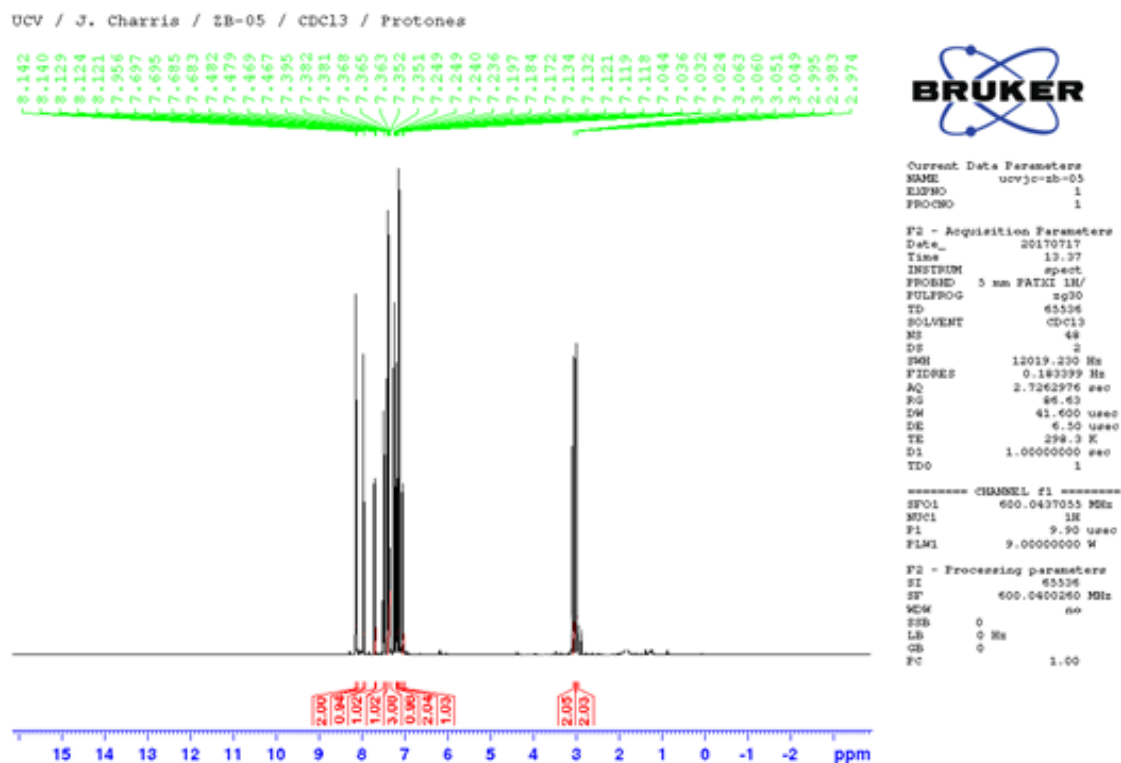

Figure S10

UCV / J. Charis / ZB-05 / CDCl<sub>3</sub> / Carbono

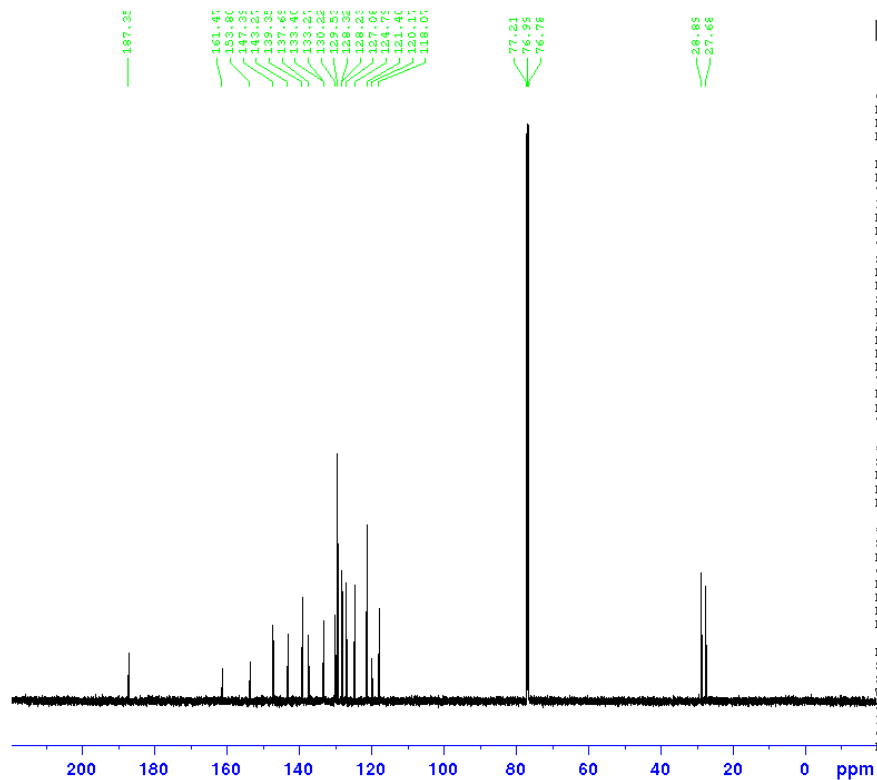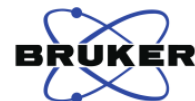

Current Data Parameters  
NAME ucvjc-zb-05  
EXPNO 2  
PROCNO 1

F2 - Acquisition Parameters  
Date\_ 20170717  
Time 13.49  
INSTRUM spect  
PROBHD 5 mm PATXI 1H/  
PULPROG zgpg30  
TD 65536  
SOLVENT CDCl<sub>3</sub>  
NS 666  
DS 4  
SWH 36057.691 Hz  
FIDRES 0.550197 Hz  
AQ 0.9087659 sec  
RG 190.12  
DM 13.867 usec  
DE 6.50 usec  
TE 298.8 K  
D1 2.00000000 sec  
D11 0.03000000 sec  
TD0 1

===== CHANNEL f1 =====  
SFO1 150.8952653 MHz  
NUC1 13C  
P1 11.00 usec  
PLW1 220.00000000 W

===== CHANNEL f2 =====  
SFO2 600.0424002 MHz  
NUC2 1H  
CPDPRG2 valtz16  
PCPD2 70.00 usec  
PLW2 9.00000000 W  
PLW12 0.18002000 W  
PLW13 0.08820900 W

F2 - Processing parameters  
SI 32768  
SF 150.8801840 MHz  
WDW EM  
SSB 0  
LB 1.00 Hz  
GB 0  
PC 1.40

Figure S11

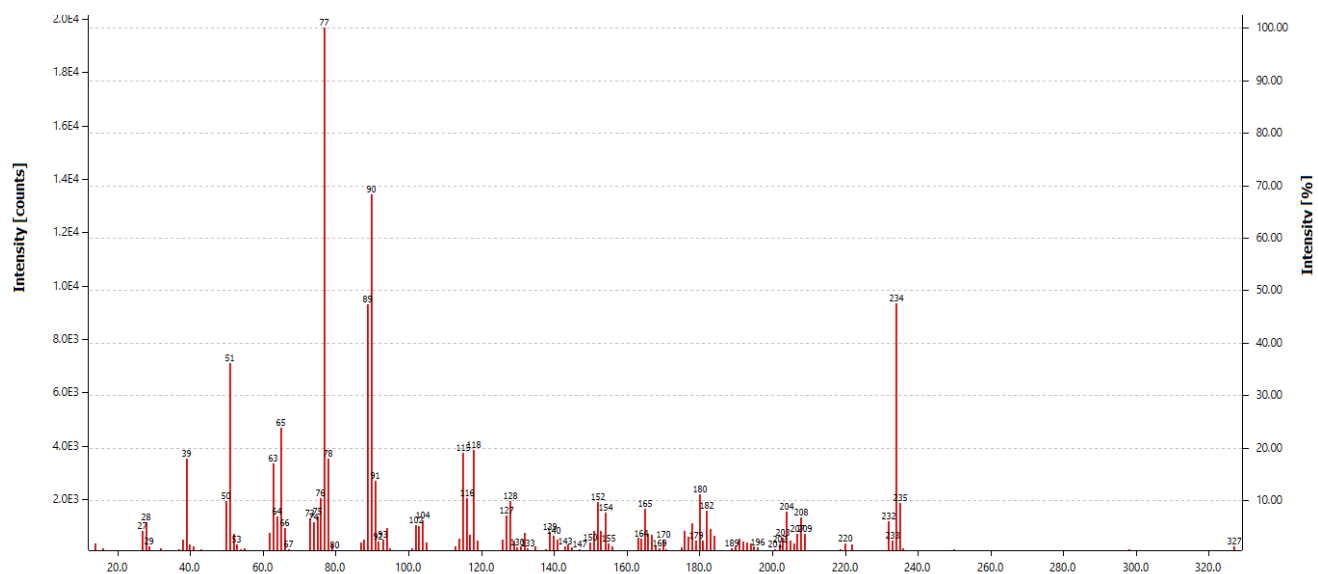

Figure S12

UCV / J. Charris / ZB-10 / CDCl<sub>3</sub> / Protones

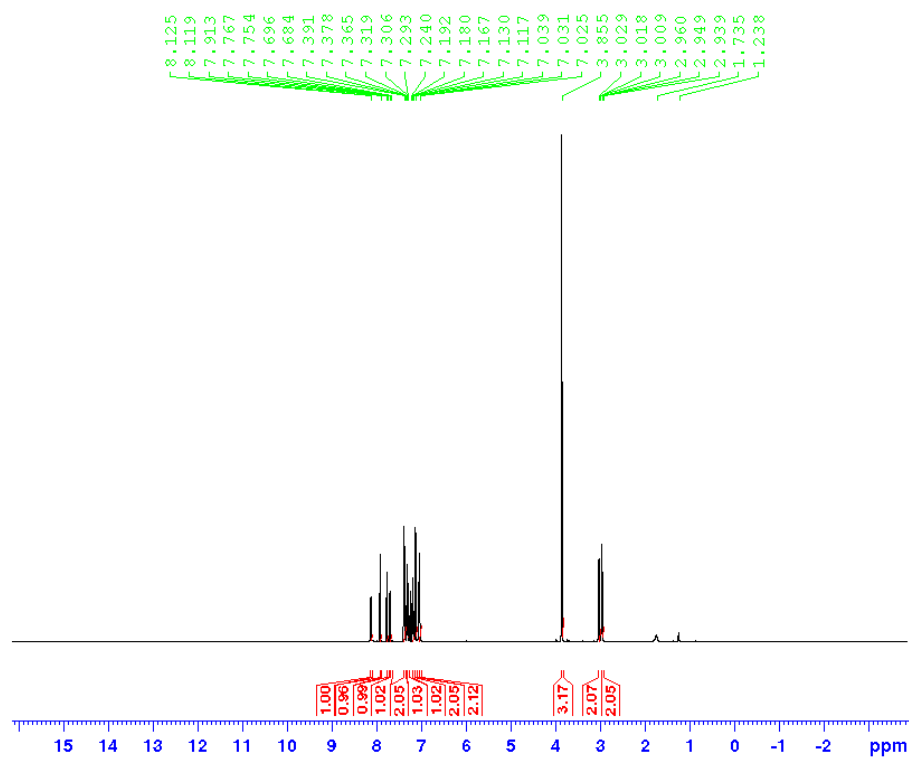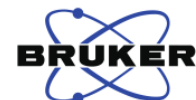

Current Data Parameters  
NAME ucvjc-zb-10  
EXPNO 1  
PROCNO 1

F2 - Acquisition Parameters  
Date\_ 20170717  
Time 10.19  
INSTRUM spect  
PROBHD 5 mm FATHI 1H/  
PULPROG zg30  
TD 65536  
SOLVENT CDCl<sub>3</sub>  
NS 48  
DS 2  
SWH 12019.230 Hz  
FIDRES 0.183399 Hz  
AQ 2.7262976 sec  
RG 86.63  
DW 41.600 usec  
DE 6.50 usec  
TE 297.6 K  
D1 1.00000000 sec  
TD0 1

===== CHANNEL f1 =====  
SFO1 600.0437055 MHz  
NUC1 1H  
P1 9.90 usec  
PLW1 9.00000000 W

F2 - Processing parameters  
SI 65536  
SF 600.0400260 MHz  
WDW no  
SSB 0  
LB 0 Hz  
GB 0  
FC 1.00

Figure S13

UCV / J. Charis / ZB-10 / CDCl<sub>3</sub> / Carbono

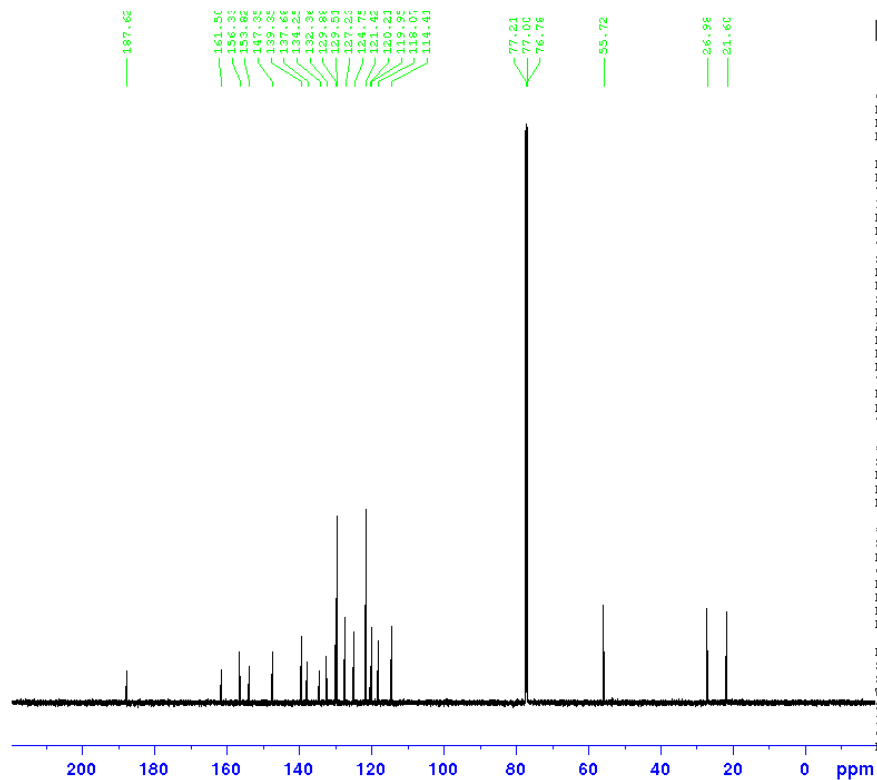

Current Data Parameters  
NAME ucvjc-zb-10  
EXPNO 2  
PROCNO 1

F2 - Acquisition Parameters  
Date\_ 20170717  
Time 10.20  
INSTRUM spect  
PROBHD 5 mm PATXI 1H/  
PULPROG zgpg30  
TD 65536  
SOLVENT CDCl3  
NS 1024  
DS 4  
SWH 36057.691 Hz  
FIDRES 0.550197 Hz  
AQ 0.9087659 sec  
RG 190.12  
DM 13.867 usec  
DE 6.50 usec  
TE 297.9 K  
D1 2.00000000 sec  
D11 0.03000000 sec  
TD0 1

===== CHANNEL f1 =====  
SFO1 150.8952653 MHz  
NUC1 13C  
P1 11.00 usec  
PLW1 220.00000000 W

===== CHANNEL f2 =====  
SFO2 600.0424002 MHz  
NUC2 1H  
CPDPRG2 valtm16  
PCPD2 70.00 usec  
PLW2 9.00000000 W  
PLW12 0.18002000 W  
PLW13 0.08820900 W

F2 - Processing parameters  
SI 32768  
SF 150.8801845 MHz  
WDW EM  
SSB 0  
LB 1.00 Hz  
GB 0  
PC 1.40

Figure S14

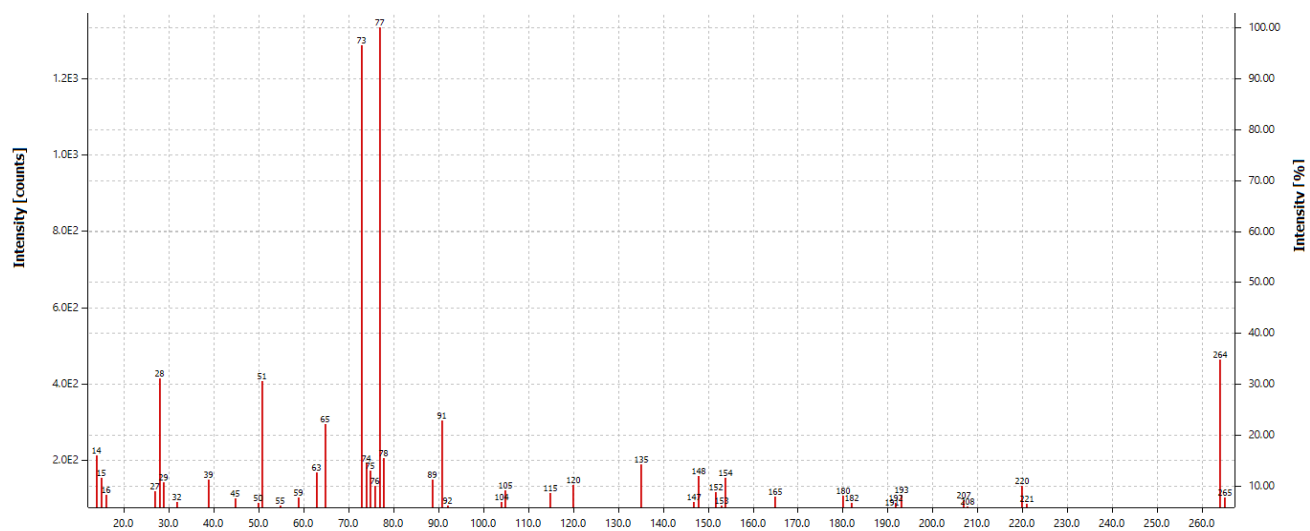



Figure S15

UCV / J. Charis / ZB-22 / CDCl3 / Protones

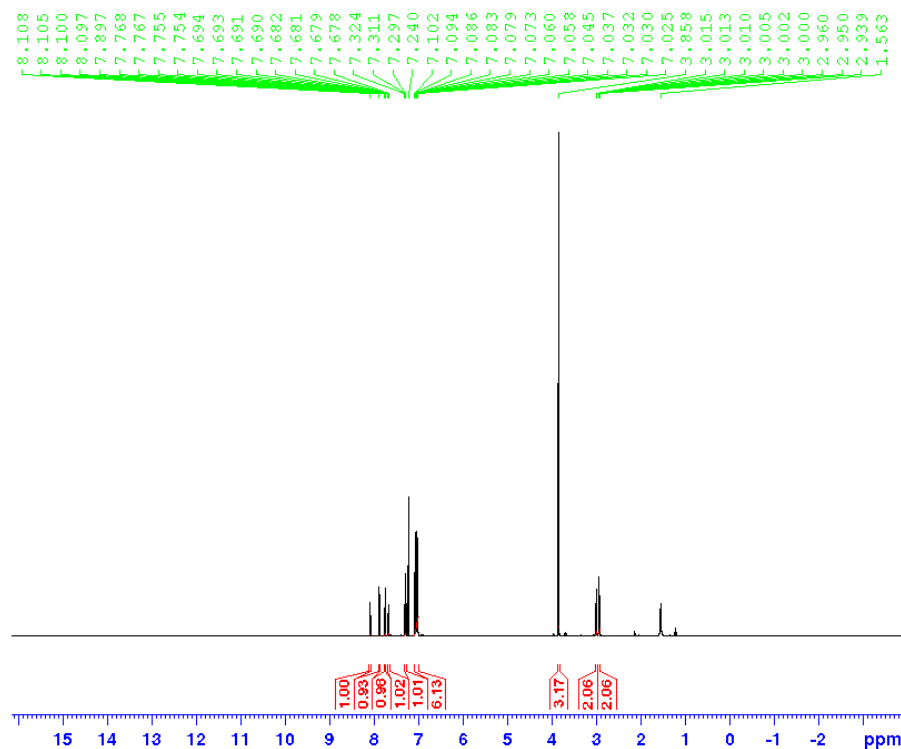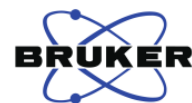

Current Data Parameters  
NAME ucvjch-zb-22  
EXPNO 1  
PROCNO 1

F2 - Acquisition Parameters  
Date\_ 20180303  
Time 10.30  
INSTRUM spect  
PROBHD 5 mm PATXI 1H/  
PULPROG zg30  
TD 65536  
SOLVENT CDCl3  
NS 96  
DS 2  
SWH 12019.230 Hz  
FIDRES 0.183399 Hz  
AQ 2.7262976 sec  
RG 190.12  
DW 41.600 usec  
DE 6.50 usec  
TE 298.1 K  
D1 1.00000000 sec  
TD0 1

===== CHANNEL f1 =====  
SFO1 600.0437055 MHz  
NUC1 1H  
P1 9.90 usec  
PLW1 9.00000000 W

F2 - Processing parameters  
SI 65536  
SF 600.0400262 MHz  
WDW no  
SSB 0  
LB 0 Hz  
GB 0  
PC 1.00

Figure S16

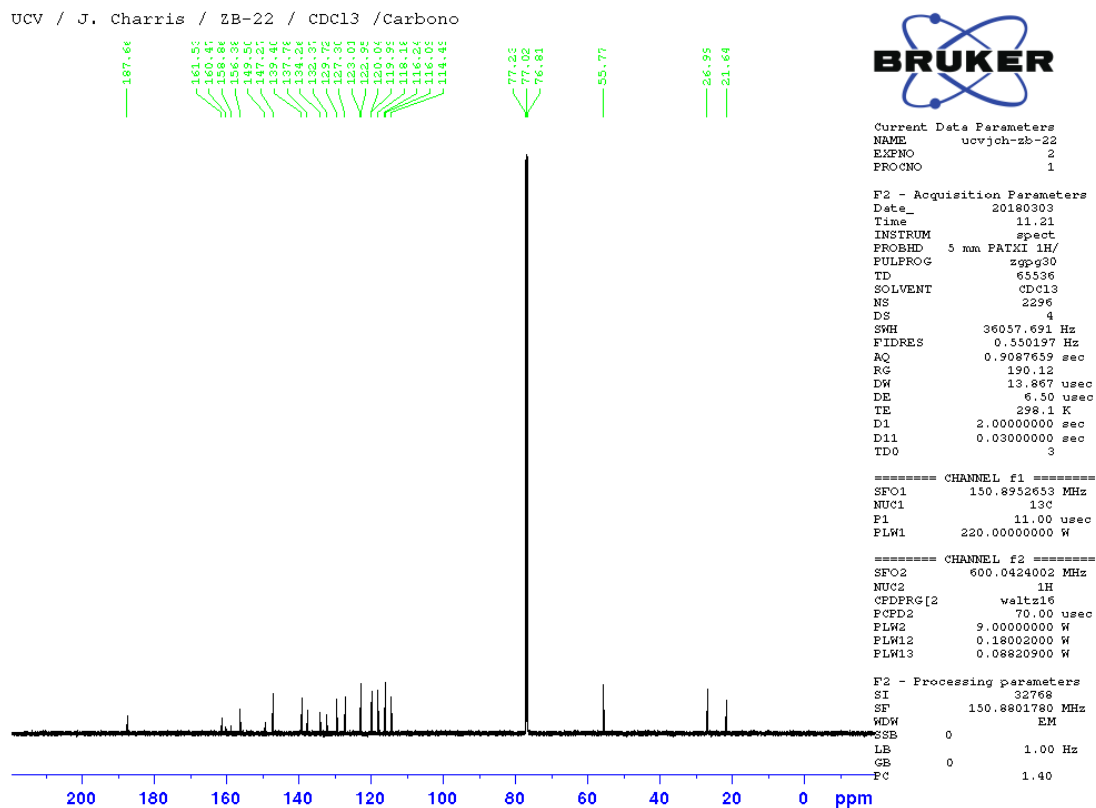

Figure S17

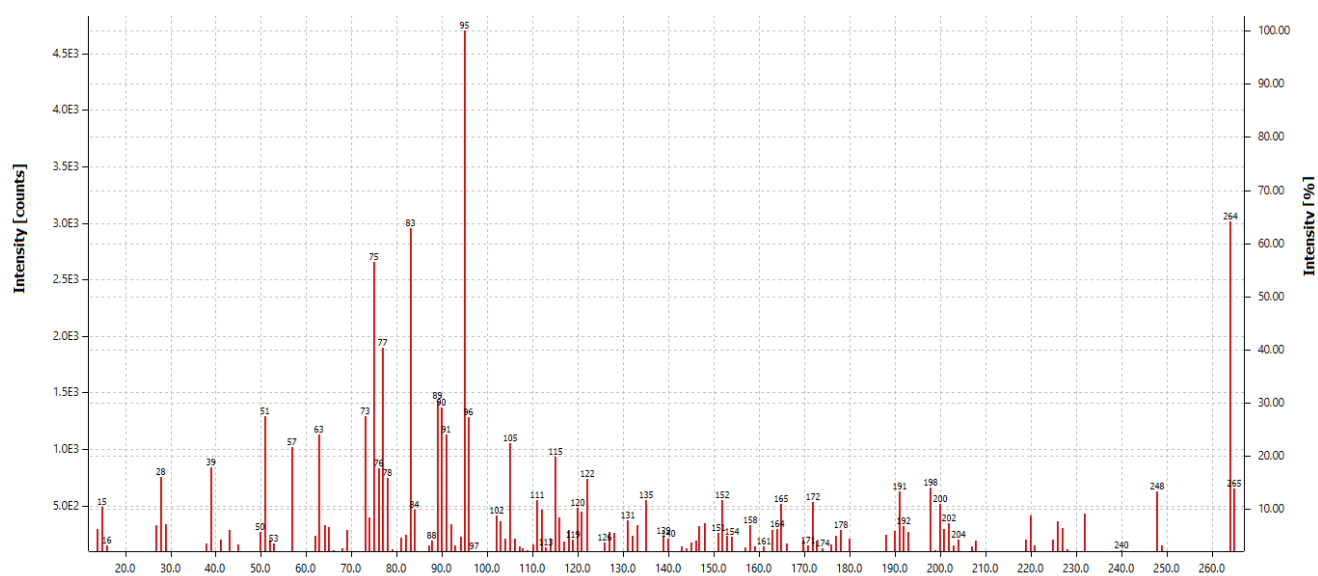

Figure S18

UCV / J. Charris / ZB-23 / CDCl<sub>3</sub> / Protones

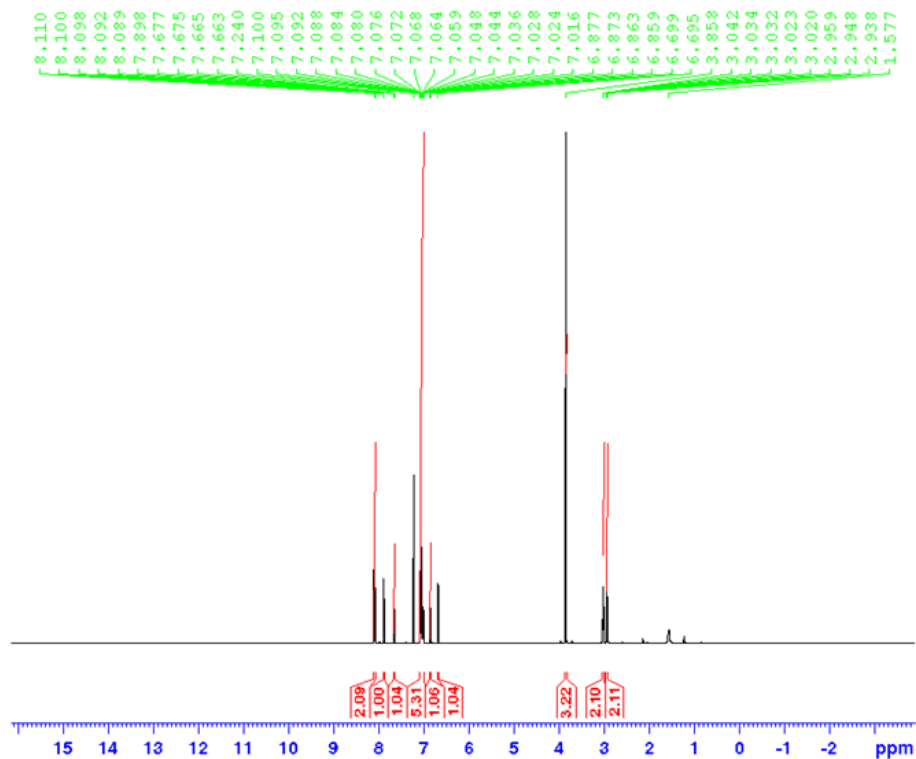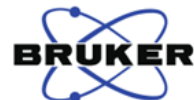

Current Data Parameters  
NAME ucvjch-zb-23  
EXPNO 1  
PROCNO 1

F2 - Acquisition Parameters  
Date\_ 20180304  
Time 11.31  
INSTRUM spect  
PROBHD 5 mm PATXI 1H/  
PULPROG zg30  
TD 65536  
SOLVENT CDCl<sub>3</sub>  
NS 96  
DS 2  
SWH 12019.230 Hz  
FIDRES 0.183399 Hz  
AQ 2.7262976 sec  
RG 190.12  
DW 41.600 usec  
DE 6.50 usec  
TE 298.2 K  
D1 1.00000000 sec  
TD0 1

===== CHANNEL f1 =====  
SFO1 600.0437055 MHz  
NUC1 1H  
P1 9.90 usec  
PLW1 9.00000000 W

F2 - Processing parameters  
SI 65536  
SF 600.0400262 MHz  
WDW no  
SSB 0  
LB 0 Hz  
GB 0  
PC 1.00

Figure S19

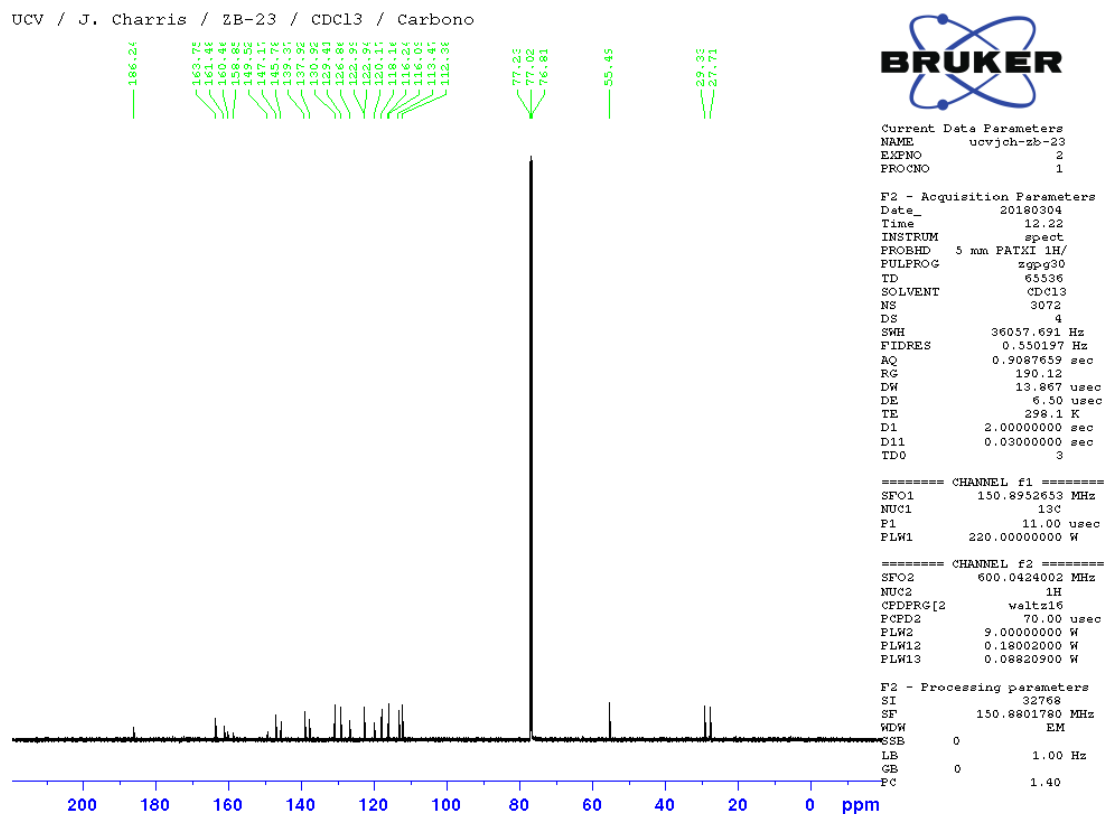

Figure S20

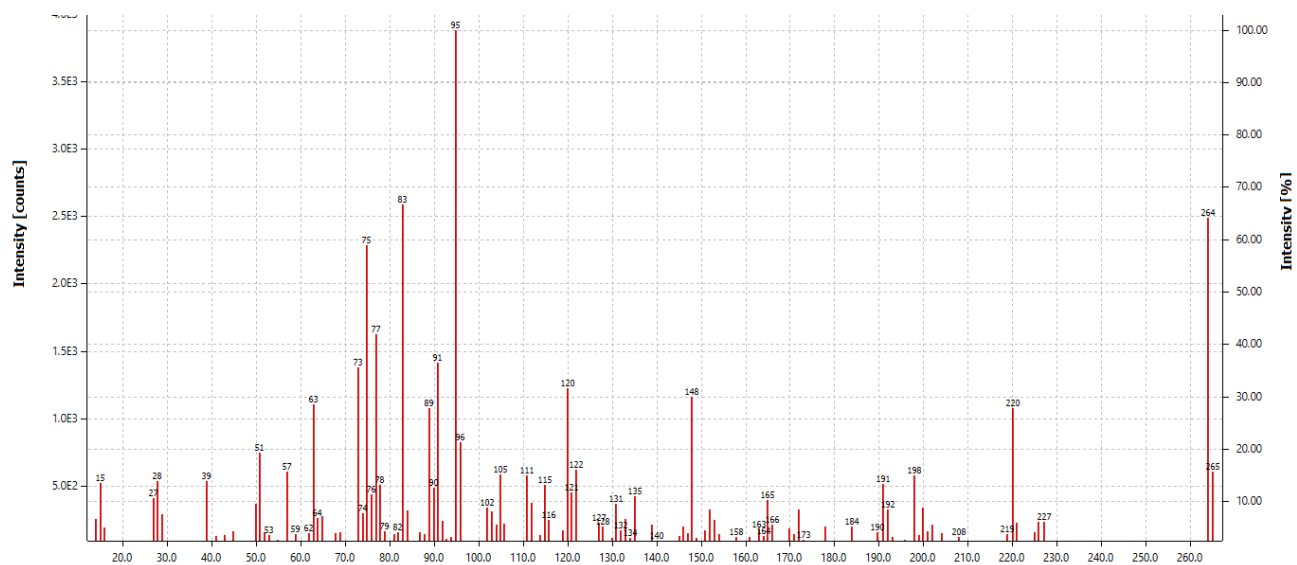

Figure S21

UCV / J. Charris / ZB-32 / CDCl3 / Protones

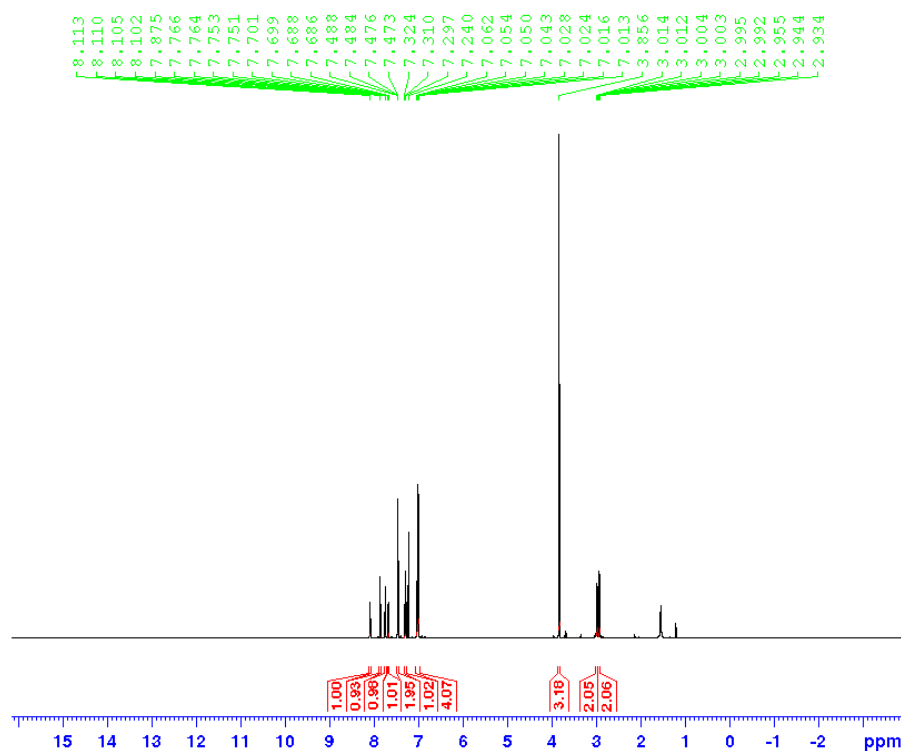

Current Data Parameters  
NAME ucvjch-zb-32  
EXPNO 1  
PROCNO 1

F2 - Acquisition Parameters  
Date\_ 20180301  
Time 13.06  
INSTRUM spect  
PROBHD 5 mm PATXI 1H/  
PULPROG zg30  
TD 65536  
SOLVENT CDCl3  
NS 64  
DS 2  
SWH 12019.230 Hz  
FIDRES 0.183399 Hz  
AQ 2.7262976 sec  
RG 190.12  
DW 41.600 usec  
DE 6.50 usec  
TE 298.2 K  
D1 1.00000000 sec  
TD0 1

===== CHANNEL f1 =====  
SFO1 600.0437055 MHz  
NUC1 1H  
P1 9.90 usec  
PLW1 9.00000000 W

F2 - Processing parameters  
SI 65536  
SF 600.0400262 MHz  
WDW no  
SSB 0  
LB 0 Hz  
GB 0  
PC 1.00

Figure S22

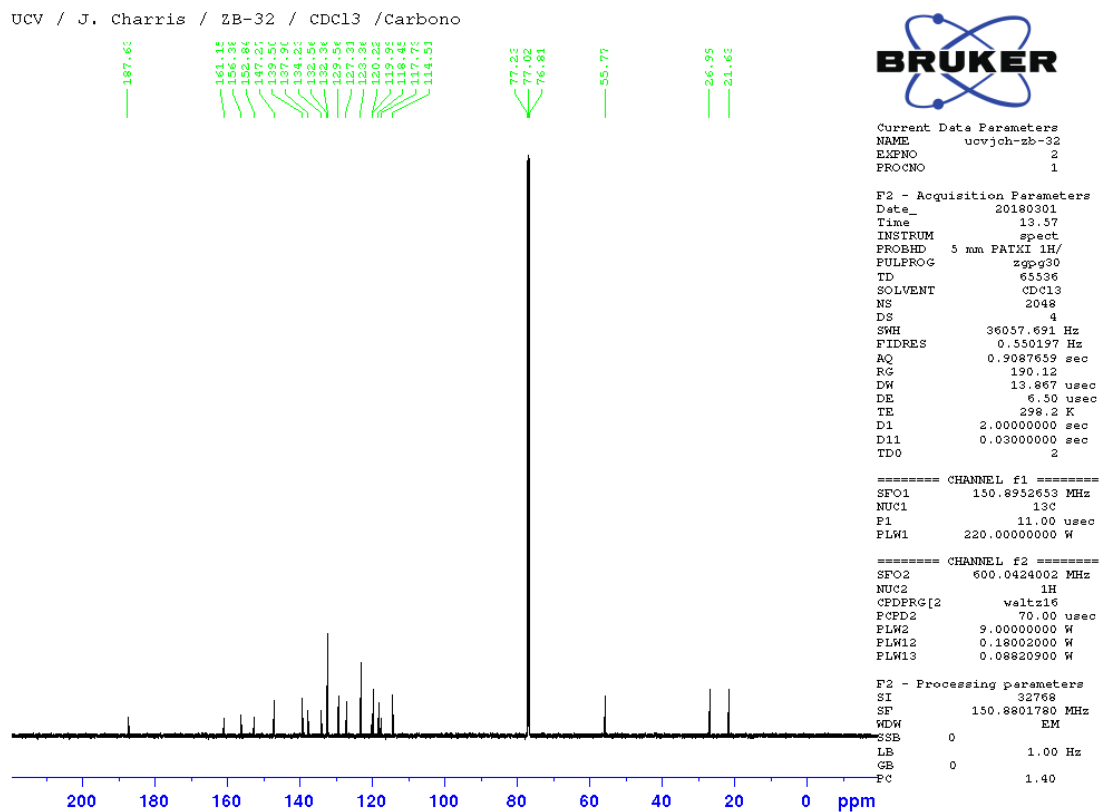



Figure S23

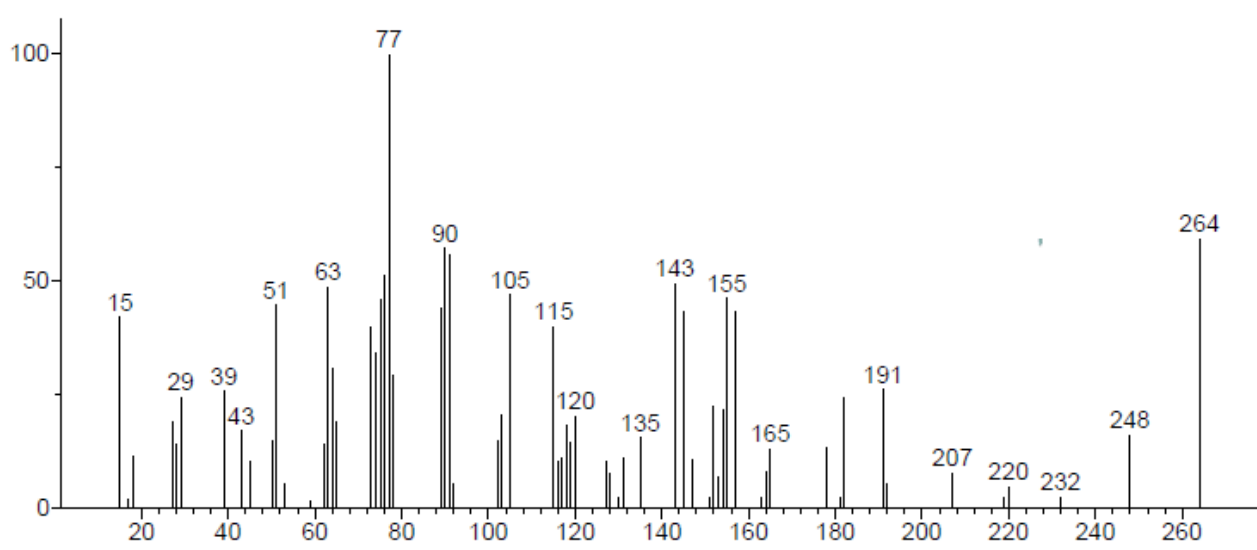

Figure S24

UCV / J. Charis / ZB-33 / CDCl<sub>3</sub> / Protones

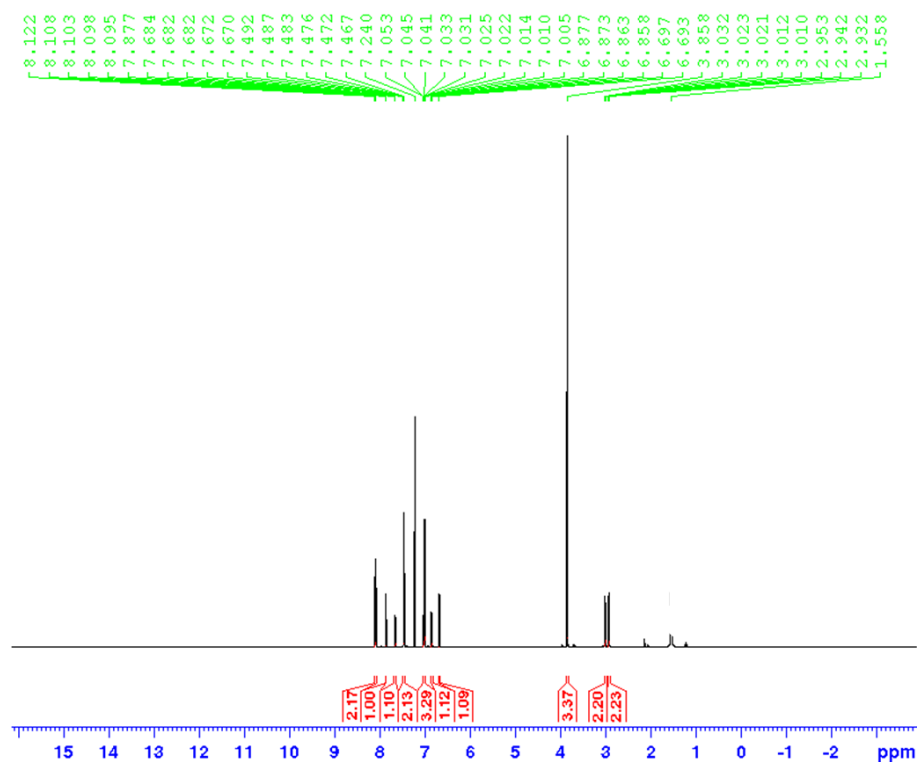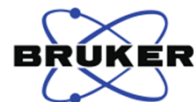

Current Data Parameters  
NAME ucvjch-zb-33  
EXPNO 1  
PROCNO 1

F2 - Acquisition Parameters  
Date\_ 20180302  
Time 7.54  
INSTRUM spect  
PROBHD 5 mm PATXI 1H/  
PULPROG zg30  
TD 65536  
SOLVENT CDCl<sub>3</sub>  
NS 96  
DS 2  
SWH 12019.230 Hz  
FIDRES 0.183399 Hz  
AQ 2.7262976 sec  
RG 190.12  
DH 41.600 usec  
DE 6.50 usec  
TE 298.2 K  
D1 1.00000000 sec  
TD0 1

===== CHANNEL f1 =====  
SFO1 600.0437055 MHz  
NUC1 1H  
P1 9.90 usec  
PLW1 9.00000000 W

F2 - Processing parameters  
SI 65536  
SF 600.0400262 MHz  
WDW no  
SSB 0  
LB 0 Hz  
GB 0  
PC 1.00

Figure S25

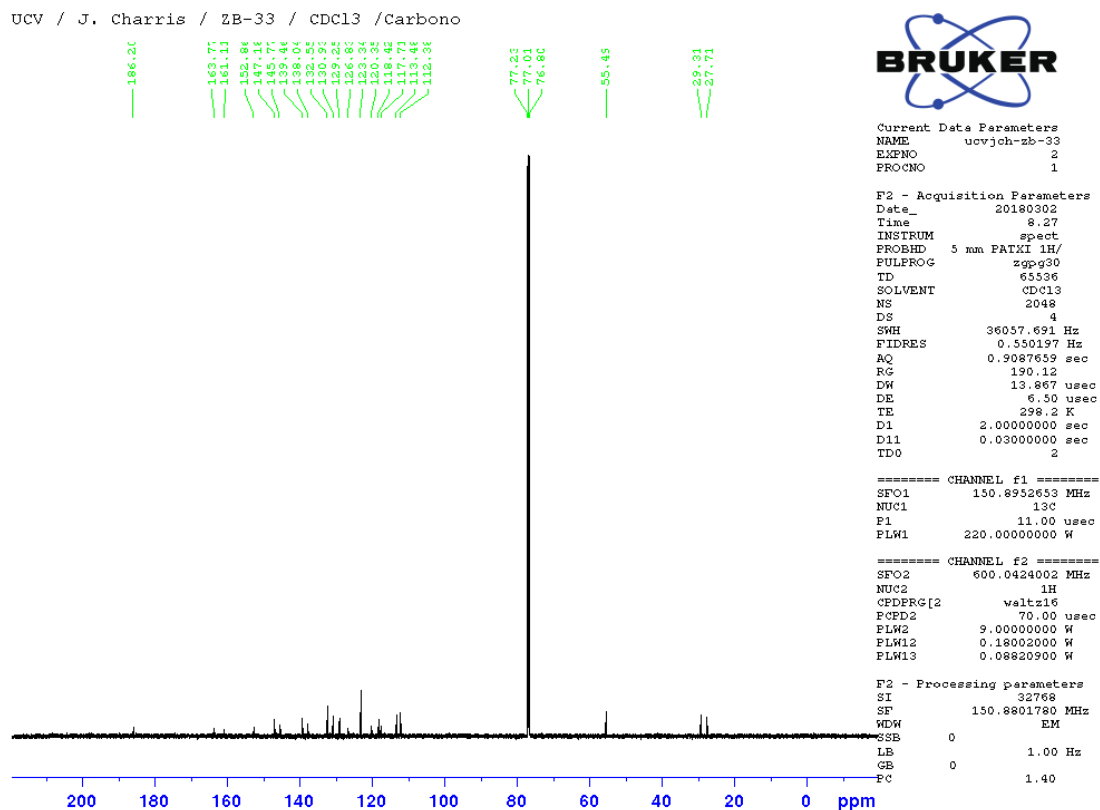

Figure S26

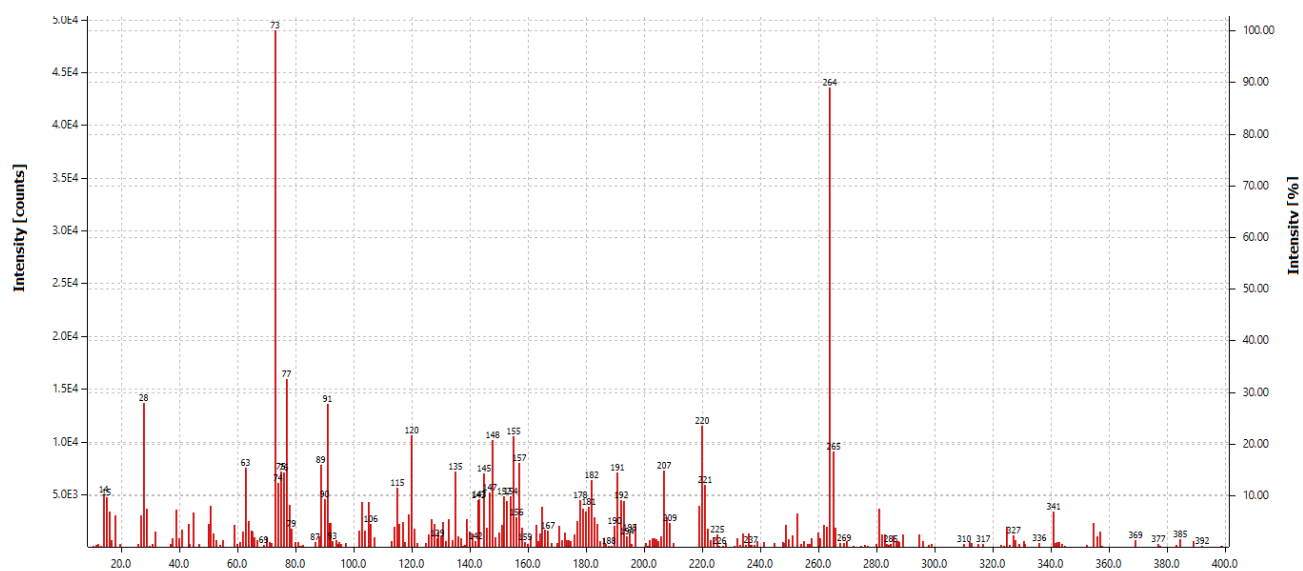

Figure S27

UCV / J. Charris / ZB-06 / CDCl<sub>3</sub> / Protones

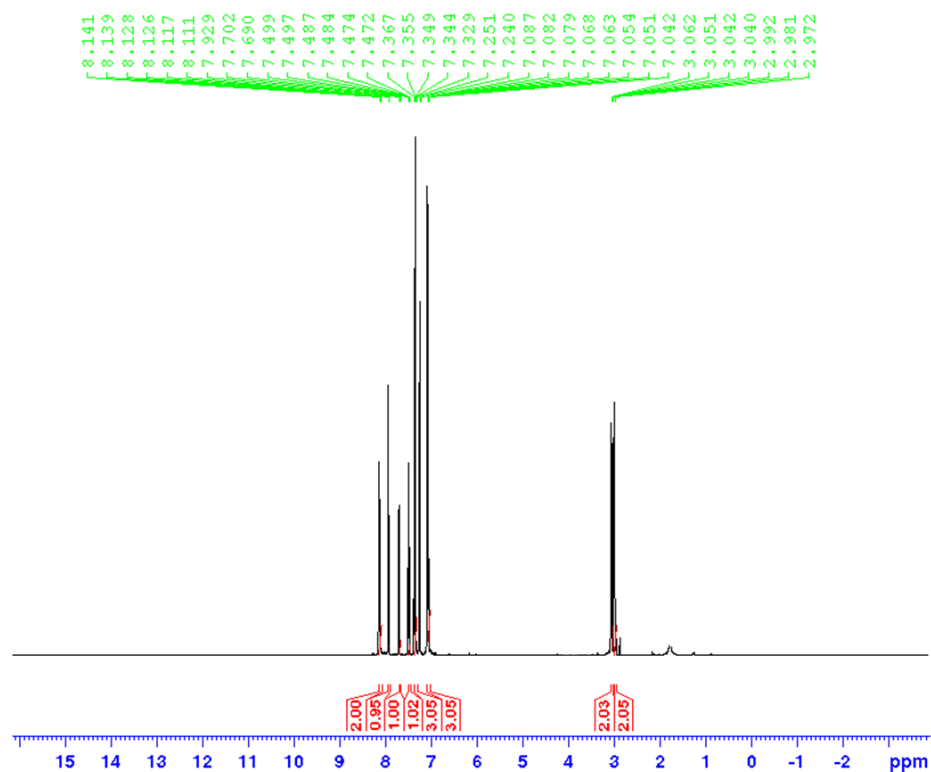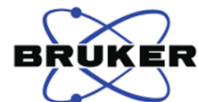

Current Data Parameters  
NAME ucvjc-zb-06  
EXPNO 1  
PROCNO 1

F2 - Acquisition Parameters  
Date\_ 20170717  
Time 14.19  
INSTRUM spect  
PROBHD 5 mm PATXI 1H/  
PULPROG zg30  
TD 65536  
SOLVENT CDCl<sub>3</sub>  
NS 48  
DS 2  
SWH 12019.230 Hz  
FIDRES 0.183399 Hz  
AQ 2.7262976 sec  
RG 86.63  
DW 41.600 usec  
DE 6.50 usec  
TE 298.1 K  
D1 1.00000000 sec  
TD0 1

===== CHANNEL f1 =====  
SFO1 600.0437055 MHz  
NUC1 1H  
P1 9.90 usec  
PLW1 9.00000000 W

F2 - Processing parameters  
SI 65536  
SF 600.0400260 MHz  
WDW no  
SSB 0  
LB 0 Hz  
GB 0  
PC 1.00

Figure S28

UCV / J. Charis / ZB-06 / CDCl<sub>3</sub> / Carbono

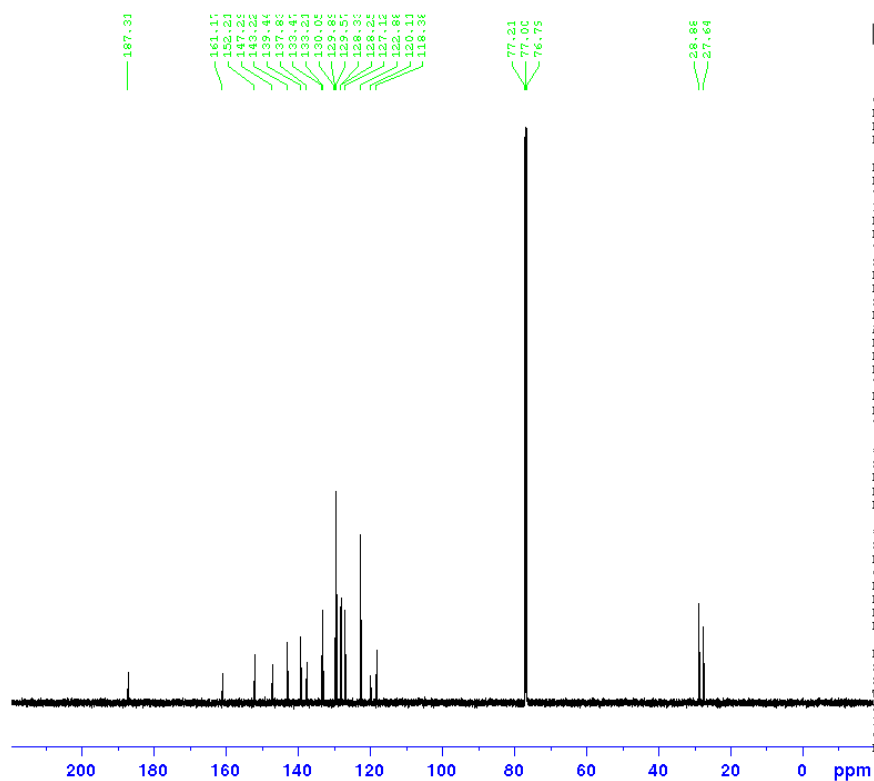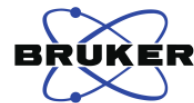

Current Data Parameters

|        |             |
|--------|-------------|
| NAME   | ucvjc-zb-06 |
| EXPNO  | 2           |
| PROCNO | 1           |

F2 - Acquisition Parameters

|         |                |
|---------|----------------|
| Date_   | 20170717       |
| Time    | 14.29          |
| INSTRUM | spect          |
| PROBHD  | 5 mm PATXI 1H/ |
| PULPROG | zgpg30         |
| TD      | 65536          |
| SOLVENT | CDCl3          |
| NS      | 636            |
| DS      | 4              |
| SWH     | 36037.691 Hz   |
| FIDRES  | 0.550197 Hz    |
| AQ      | 0.9087659 sec  |
| RG      | 190.12         |
| DW      | 13.867 usec    |
| DE      | 6.50 usec      |
| TE      | 298.6 K        |
| D1      | 2.00000000 sec |
| D11     | 0.03000000 sec |
| TD0     | 1              |

===== CHANNEL f1 =====

|      |                 |
|------|-----------------|
| SFO1 | 150.8952653 MHz |
| NUC1 | 13C             |
| F1   | 11.00 usec      |
| PLW1 | 220.00000000 W  |

===== CHANNEL f2 =====

|           |                 |
|-----------|-----------------|
| SFO2      | 600.0424002 MHz |
| NUC2      | 1H              |
| CEDERG[2] | waltz16         |
| PCPD2     | 70.00 usec      |
| PLW2      | 9.00000000 W    |
| PLW12     | 0.18002000 W    |
| PLW13     | 0.08820900 W    |

F2 - Processing parameters

|     |                 |
|-----|-----------------|
| SI  | 32768           |
| SF  | 150.8801837 MHz |
| WDW | EM              |
| SSB | 0               |
| LB  | 1.00 Hz         |
| GB  | 0               |
| FC  | 1.40            |

Figure S29

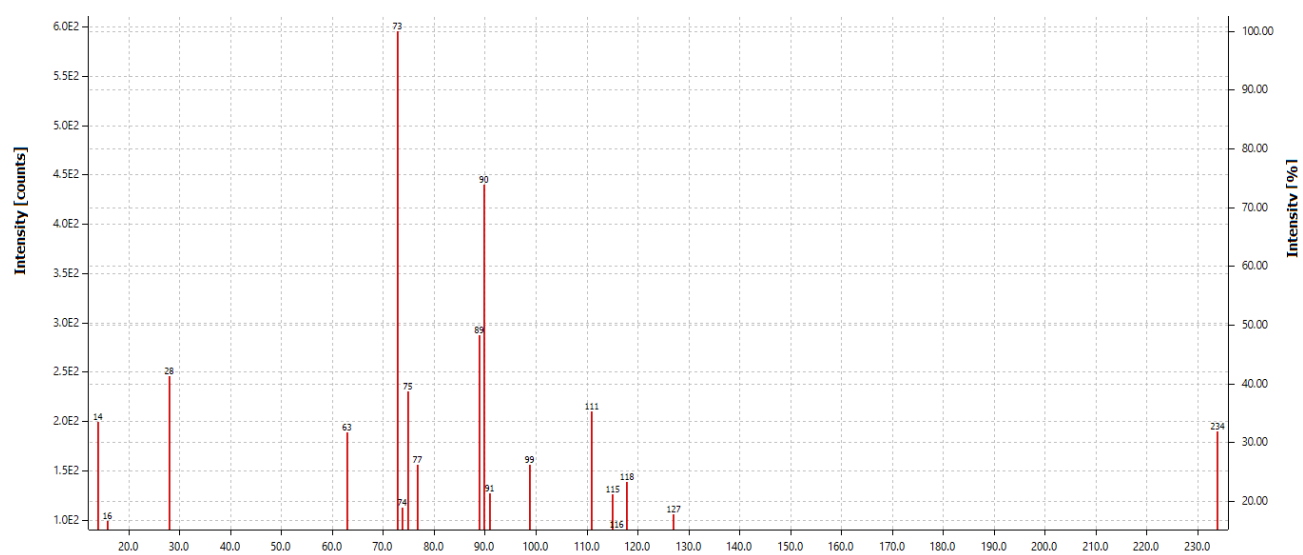

Figure S30

UCV / J. Charris / ZB-09 / CDCl<sub>3</sub> / Protones

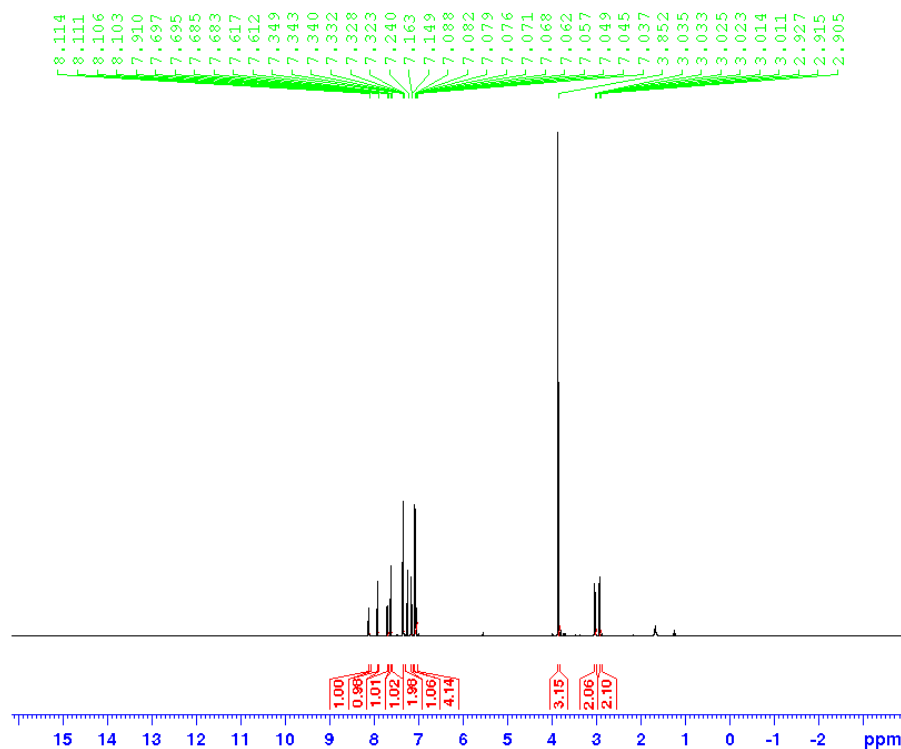

Current Data Parameters  
NAME ucvjc-zb-09  
EXPNO 1  
PROCNO 1

F2 - Acquisition Parameters  
Date\_ 20170718  
Time 7.35  
INSTRUM spect  
PROBHD 5 mm PATXI 1H/  
PULPROG zg30  
TD 65536  
SOLVENT CDCl<sub>3</sub>  
NS 48  
DS 2  
SWH 12019.230 Hz  
FIDRES 0.183399 Hz  
AQ 2.7262976 sec  
RG 86.63  
DW 41.600 usec  
DE 6.30 usec  
TE 297.9 K  
D1 1.00000000 sec  
TD0 1

===== CHANNEL f1 =====  
SFO1 600.0437035 MHz  
NUC1 1H  
P1 9.90 usec  
PLW1 9.00000000 W

F2 - Processing parameters  
SI 65536  
SF 600.0400260 MHz  
WDW no  
SSB 0  
LB 0 Hz  
GB 0  
PC 1.00



Figure S31

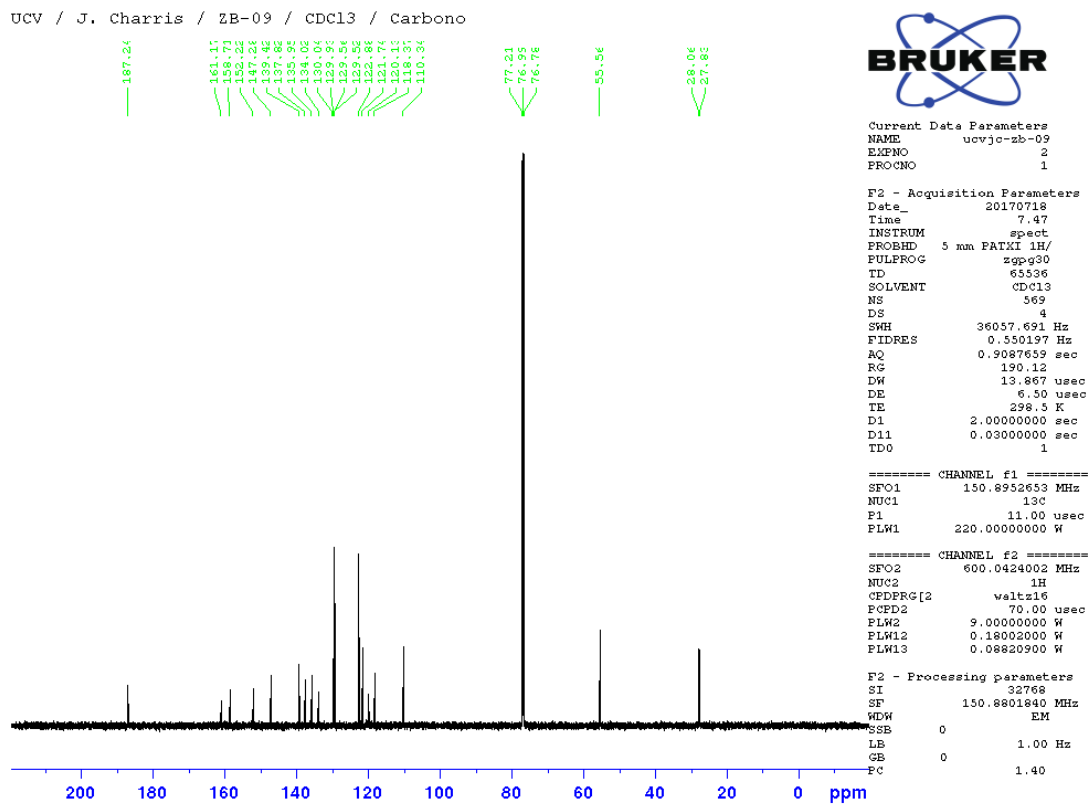

Figure S32

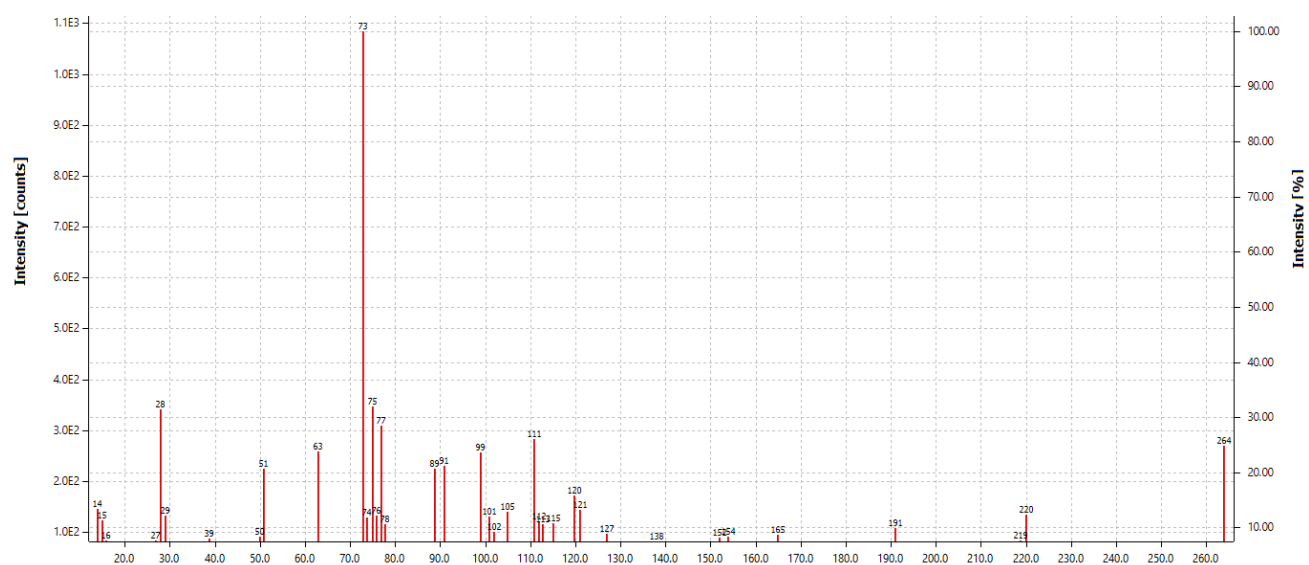

## Supporting Information for Tables

### Synthesis, leishmanicidal, trypanocidal, antiproliferative assay and apoptotic induction of (2-phenoxy pyridin-3-yl)naphthalen-1(2*H*)-one derivatives

**Table S1** Quantitative analysis of percent of apoptotic effect on human K562 cell line induced by compounds **18** and **22**

| Comp.          | $\mu\text{M}$ | K562    |         |         |
|----------------|---------------|---------|---------|---------|
|                |               | AV+/IP- | AV+/IP+ | AV-/IP+ |
| <b>18</b>      | 5             | 22.70   | 2.84    | 0.89    |
| <b>18</b>      | 10            | 8.69    | 89.50   | 1.12    |
| <b>22</b>      | 5             | 20.90   | 1.85    | 0.44    |
| <b>22</b>      | 10            | 21.80   | 77.70   | 0.29    |
| <b>Dox</b>     | 1             | 29.40   | 29.80   | 19.20   |
| <b>QC</b>      | 50            | 34.30   | 6.25    | 1.57    |
| <b>Control</b> |               | 4.63    | 2.00    | 1.60    |

Data are expressed as a percentage of the total cellular population of at least three determinations, **Dox** = doxorubicin, **QC** = quercetin, **Control** = untreated cells, **AV+=** Annexin-V Positive, **IP+=** Propidium iodide Positive, \*p <0.05, \*\*p <0.01 vs control

**Table S2** Quantitative analysis of percent of apoptotic effect on human A549 cell line induced by compounds **18** and **22**

| Comp.          | $\mu\text{M}$ | A549    |         |         |
|----------------|---------------|---------|---------|---------|
|                |               | AV+/IP- | AV+/IP+ | AV-/IP+ |
| <b>18</b>      | 10            | 11.10   | 3.28    | 3.06    |
| <b>18</b>      | 25            | 40.10   | 21.10   | 3.12    |
| <b>22</b>      | 10            | 13.80   | 23.30   | 8.44    |
| <b>22</b>      | 25            | 9.36    | 78.30   | 9.32    |
| <b>Dox</b>     | 1             | 8.33    | 33.50   | 29.30   |
| <b>QC</b>      | 50            | 26.10   | 21.70   | 5.60    |
| <b>Control</b> |               | 5.92    | 1.56    | 1.90    |

Data are expressed as a percentage of the total cellular population of at least three determinations, **Dox** = doxorubicin, **QC** = quercetin, **Control** = untreated cells, **AV+=** Annexin-V Positive, **IP+=** Propidium iodide Positive, \*p <0.05, \*\*p <0.01 vs control
